# Does human P-glycoprotein efflux involve transmembrane alpha helix breakage?

**Authors:** Cátia A. Bonito<sup>1,2</sup>, Maria-José U. Ferreira<sup>2</sup>, Ricardo J. Ferreira<sup>2,3,\*</sup>, Daniel J. V. A. dos Santos<sup>1,2,4,\*</sup>

## Affiliations:

<sup>1</sup> LAQV@REQUIMTE, Department of Chemistry and Biochemistry, Faculty of Sciences, University of Porto, Rua do Campo Alegre, 4169-007, Porto, Portugal.

<sup>2</sup> Research Institute for Medicines (iMed.Ulisboa), Faculty of Pharmacy, Universidade de Lisboa, Avenida Prof. Gama Pinto, 1649-003 Lisboa, Portugal.

<sup>3</sup> Department of Cell and Molecular Biology - Molecular Biophysics, Biomedicinskt centrum (BMC), Uppsala University, Husargatan 3, 752 37 Uppsala, Sweden.

<sup>4</sup> BioISI: Biosystems and Integrative Sciences Institute, Faculty of Sciences, University of Lisbon, Campo Grande, C8, 1749-016, Lisbon, Portugal.

\*Correspondence to: [ricardo.ferreira@icm.uu.se](mailto:ricardo.ferreira@icm.uu.se) or [ddsantos@fc.up.pt](mailto:ddsantos@fc.up.pt)

**Abstract:** The occluded conformation suggested in a recent article that revealed a new inward-facing conformation for the human P-glycoprotein may not represent the closing of a gate region but instead an artifact derived from lateral compression in a too small sized nanodisc, used to stabilize the transmembrane domains of the transporter.

A research article published by Locher and co-workers [1] turns an important page in studying ABC transporters because it is the first cryo-EM inward-facing structure of human P-glycoprotein (P-gp), obtained with both substrate and inhibitor bound, that together with the outward-facing ATP-bound human P-gp published in 2018 [2] allow a more complete overview on the conformational changes associated to the efflux cycle. However, the claiming by the authors that authors state that "...an occluded conformation (...) in a central cavity formed by closing of a gate region consisting on TM4 and TM10" must be thoroughly discussed. Although correct from the commonly accepted mechanistic point of view, the presence of such discontinuities in both helices is strikingly different from all other published structures [3–8], in which both TM4 and/or TM10 are depicted as full helical domains. As under normal bending forces the breakage of

32 hydrogen bonds that hold the helical structure together should not occur [9], it is important to try  
33 clarifying the underlying reason.

34 This specific feature had already been reported for a murine P-gp structure [8] in the  
35 presence of cyclopeptides from the QZ series. Together with ATPase and Calcein-AM transport  
36 assays, Szewczyk and co-workers proposed that the structural kink observed in TM4 (but not  
37 TM10) were induced by ligands that function more as activators of ATPase (QZ-Ala and QZ-Val)  
38 while non-activators (QZ-Leu and QZ-Phe) failed to induce the TM4 kink. However, a previous  
39 P-gp structure also co-crystallized with QZ-Val failed to show any kink on either TM4 or TM10  
40 [3,10]. This way, the comparison between both murine and human structures suggests three  
41 additional questions: 1) if related to ligand entry, why did not TM10 kinked as TM4 after the  
42 passage of the QZ activators through the TM4/TM6 portal in the murine structure?, 2) by which  
43 gate taxol entered into hP-gp, because both TM4 and TM10 are kinked and 3) if related to ATPase  
44 activators, why did zosuquidar (inhibitor, IC<sub>50</sub> 60 nm) [11] induced a similar TM4/TM10 kink as  
45 substrates do? Most intriguingly, the proposed occluded conformation also impairs the regulation  
46 of the inherent substrate specificity of P-gp by a small linker region (missing in all structures)  
47 [12,13] because it becomes unable to directly interact with substrates.

48 To answer all these questions, we started by comparing all P-gp (ABCB1) structures  
49 available in the Protein Data Bank (**Table 1**). It is possible to verify that, while NBD-NBD  
50 distances in murine P-gp structures are within 48 Å (4M1M) up to 65 Å (4Q9K), in the inward-  
51 facing human P-gp, this distance reduces to only 34 Å (bound to zosuquidar) or 37 Å (bound to  
52 taxol), only 7-8 Å greater than those registered for the outward-facing P-gp structures reported to  
53 date (28 Å) [2,14]. However, as these structures were obtained without the presence of ATP, how  
54 can we explain such reduction in NBD-NBD distances? More interestingly, another murine P-gp  
55 structure also obtained by cryo-EM reported a distance of 55 Å, well within the ones reported  
56 previously in the other crystallographic structures. When reporting only to the cryo-EM structures,  
57 both inward murine (PDB ID: 6GDI) and outward human (PDB ID: 6C0V) were found to have  
58 both TM4/TM10 modelled as straight helices. Furthermore, while Thongin and co-workers  
59 identified electron densities compatible with “detergent head-groups from the annular detergent  
60 micelle (...) close to two regions predicted to delineate two pseudo-symmetry-related drug-binding  
61 sites” but no TM4/TM10 kink [5], other authors reported for the outward-facing human structure

62 that the “continuity of these helices is important to completely close the intracellular gate upon  
 63 NBD dimerization, avoiding potential leakage in the outward-facing state” [2]. So, what could be  
 64 the underlying reason for such a difference?

65 **Table 1.** Comparison of P-glycoprotein structures available in the Protein Data Bank.

| PDB ID | Organism           | Ligand                          | Class      | Conformation | NBD-NBD (Å) | Distorted TM's | Type      |
|--------|--------------------|---------------------------------|------------|--------------|-------------|----------------|-----------|
| 3WME   | <i>C. merolae</i>  | --                              | --         | inward       | 42.59       | --             | crystal   |
| 3WMG   | <i>C. merolae</i>  | aCAP                            | --         | inward       | 42.59       | 4              | crystal   |
| 4F4C   | <i>C. elegans</i>  | undecyl b-D-thiomaltopyranoside | detergent  | inward       | 58.82       | 3, 9, 10, 12   | crystal   |
| 4M1M   | <i>M. musculus</i> | --                              | --         | inward       | 48.03       | 12             | crystal   |
| 4M2S   | <i>M. musculus</i> | QZ59-Val (RRR)                  | inhibitor  | inward       | 48.32       | 12             | crystal   |
| 4Q9H   | <i>M. musculus</i> | --                              | --         | inward       | 61.85       | --             | crystal   |
| 4Q9I   | <i>M. musculus</i> | QZ-Ala (x2)                     | substrate  | inward       | 59.80       | 4              | crystal   |
| 4Q9J   | <i>M. musculus</i> | QZ-Val (x2)                     | substrate  | inward       | 62.56       | 4              | crystal   |
| 4Q9K   | <i>M. musculus</i> | QZ-Leu                          | inhibitor  | inward       | 65.38       | --             | crystal   |
| 4Q9L   | <i>M. musculus</i> | QZ-Phe                          | inhibitor  | inward       | 60.00       | --             | crystal   |
| 4XWK   | <i>M. musculus</i> | BDE-100                         | pollutant  | inward       | 60.69       | --             | crystal   |
| 5KPI   | <i>M. musculus</i> | --                              | --         | inward       | 47.99       | 12             | crystal   |
| 6A6M   | <i>C. merolae</i>  | --                              | --         | outward      | 27.65       | --             | crystal   |
| 6A6N   | <i>C. merolae</i>  | --                              | --         | inward       | 43.19       | 4              | crystal   |
| 6C0V   | <i>H. sapiens</i>  | ATP                             | nucleotide | outward      | 28.28       | --             | cryo-EM   |
| 6FN1   | chimera            | zosuquidar (x2)                 | inhibitor  | inward       | 34.14       | 4, 10, 12      | cryo-EM * |
| 6QEX   | <i>H. sapiens</i>  | taxol                           | substrate  | inward       | 36.72       | 4, 10, 12      | cryo-EM * |
| 6GDI   | <i>M. musculus</i> | --                              | --         | inward       | 55.19       | --             | cryo-EM   |

66 \* Obtained inserted in a lipid nanodisc.

67 Quite remarkably, the human P-gp structures reported by Locher and co-workers are the  
 68 first ones in which a nanodisc was employed to maintain a hydrophobic environment around the  
 69 transmembrane helices, while in all others detergent micelles were used. Nanodiscs are derived  
 70 from apolipoprotein A1, also called membrane scaffolding protein (MSP), an amphipathic protein  
 71 in which the hydrophobic helices interact with the acyl chains of the lipids while the hydrophilic  
 72 sides are exposed to the solvent, thus allowing the formation of a lipid bilayer patch in solution.  
 73 However, it was recently reported that the nanodisc lipid internal dynamics and thermotropism  
 74 may be substantially altered, abolishing gel-fluid phase transitions and increasing site-specific  
 75 order parameters that can only be fine-tuned with the addition of cholesterol [15]. As it is known  
 76 that P-gp reshapes the surrounding lipid environment up to a radius of 15-20 nm [16], and as the  
 77 inferred nanodisc size is ~10 nm (containing 120-160 lipids) [15], under the temperature conditions  
 78 required by cryo-EM and using relatively small nanodiscs, the protein conformational space may  
 79 be perturbed.

80           Although other papers already reported murine [17,18] and human [19] P-gp activities  
81 reconstituted in nanodiscs, we identified at least two main differences in nanodisc preparation.  
82 While in biochemical experiments DMPC and *E. coli* total lipid extract was used, a mixture of  
83 brain polar lipids and cholesterol was used in the cryo-EM. More important, while in the first cases  
84 the purified P-gp, MSP and lipid ratio combination were 1:50:1750 and 1:10:800 respectively, in  
85 the cryo-EM the ratio was 1:10:350. A recent paper reporting allosteric modulation of P-  
86 glycoprotein also reconstituted the transporter in nanodiscs, also used much higher ratios,  
87 1100:10:1 for lipid, MSP and protein respectively [20]. Therefore, the ratio used in cryo-EM seems  
88 very low and, since it also includes cholesterol, it is conceivable that the number of lipids within  
89 the cryo-EM nanodisc was smaller, which could have a direct influence on the protein architecture.

90           One could argue that human P-gp is intrinsically different from murine P-gp (therefore the  
91 necessity of using nanodiscs) and that this was not the only protein obtained in a nanodisc.  
92 Searching through the most recent literature, we find that a V-ATPase Vo proton channel  
93 (protein:MSP:lipid ratio 1:50:1250, PDB ID: 6C6L), a voltage-activated Kv1.2-2.1 paddle chimera  
94 channel (ratio 1:10:400, PDB ID: 6EBK) or a human  $\alpha 1\beta 3\gamma 2L$  GABAA receptor (MSP:lipid ratio  
95  $\sim$ 1:100, PDB ID: 6I53). However, and besides the higher MSP:lipid ratio that is always used in  
96 the assembly of the nanodiscs, an important difference is that all these examples possess a radial  
97 symmetry for the portion embedded in the membrane while P-gp has a pseudo two-fold symmetry.  
98 Quite interestingly, both TM4 and TM10 are located across the smaller symmetry axis, which also  
99 indirectly supports the assumption that a highly restrained environment as in cryo-EM conditions  
100 may induce such structural deformations.

101           To provide a proof of concept, we have generated a series of molecular dynamics (MD)  
102 simulations to mimic the effect of lateral compression by a nanodisc under low-temperature  
103 conditions. To speed up the calculations all waters were removed, phosphate atoms were spatially  
104 restrained in  $z$  ( $xy$  corresponds to the membrane plane) to prevent membrane disassembling and a  
105 lateral pressure of 1.5 bar ( $xy$  only) was applied, using an anisotropic pressure coupling scheme.  
106 To further promote lipid order parameters, we additionally decreased the membrane temperature  
107 (280K) while keeping the protein at 310K. Two systems were simulated, in the absence or presence  
108 of a ligand. From **Figure 1**, it is possible to verify that, in the absence of ligands, only one helix  
109 was found to bend, in this case TM10 (**Figure 1A**), similar to what was found for the murine

110 structures published by Szewczyk and co-workers. When in the presence of a large ligand as  
111 cyclosporin (with a MW above 600 Da, as taxol), both TM4 (**Figure 1B**) and TM10 (**Figure 1C**)  
112 helices were found to bend inwards, immediately below the ligand and apparently ‘closing’ the  
113 access to additional molecules. This is clear from the decrease in the root-mean square deviation  
114 between both helices regarding the human P-gp cryo-EM structure and the human P-gp homology  
115 model, shifting from 4.61 Å to 3.24 Å in TM10 and from 4.21 Å to 2.89 Å in TM4. The distance  
116 between TM4 and TM10 was also found to decrease during the 100 ns run, from 18.8 Å to 13.4  
117 Å. Thus, our simulations suggest that by applying a mild increment on the lateral pressure, TM4  
118 and TM10 tend to bend inwards immediately below the substrate, as observed in the cryo-EM  
119 structure by Locher and co-workers.

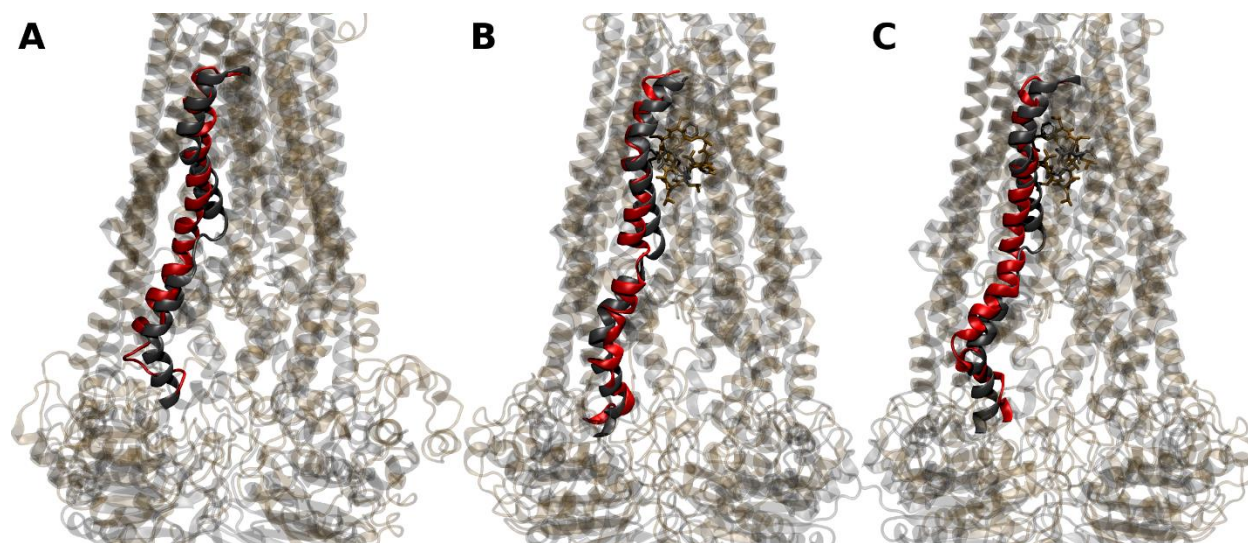

120  
121 **Figure 1.** Superimposition of human P-gp (PDB ID: 6QEX, grey) with the final conformations of molecular dynamics runs  
122 starting with a homology P-gp model (red). (A), *apo* structures (TM10 depicted); *holo* structures depicting taxol (grey) and  
123 cyclosporine (ochre) together with TM4 (B) or TM10 (C).

124 Interestingly, in the murine structures previously reported only when two QZ molecules  
125 were found at the drug-binding site (combined MW, 1212 Da) a TM4 kink was present, and in our  
126 simulations only in the presence of bound molecules such kinks were formed. More surprisingly,  
127 it was only necessary to apply a slightly higher pressure (1.1 bar) to initiate such changes,  
128 becoming more apparent when using 1.5 bar. Furthermore, we additionally observed that this  
129 effect seems to occur quite fast in the time scale of the simulations, as we were able to obtain  
130 similar results using short and harsher simulation conditions (1 ns each) or longer simulations (100  
131 ns), using more mild conditions (0.2 bar increments over 0.5 ns until reaching 1.5 bar). In other

132 words, even when the pressure increment is slower and occurs over a longer time, the distortion  
133 on TM4 and 10 occurs promptly when in the presence of a large ligand at the internal drug-binding  
134 pocket.

135 Therefore, it is our opinion that, and unlike the initially postulated hypothesis, the observed  
136 ‘gate closing’ in the recently published cryo-EM human P-glycoprotein structure may be an artifact  
137 from a too small nanodisc construct used for stabilizing the transmembrane domains of the  
138 transporter. Under certain cryo-EM conditions, the internal lipid dynamics provided by the  
139 nanodisc may render unfavorable conditions for the structural stability of the transporters’  
140 architecture, leading to severe distortions of TM4 and TM10 helices. This also upholds the  
141 importance of a careful choice of the experimental conditions and protocol to be used to obtain  
142 reliable models of membrane proteins since these cryo-EM structures are establishing new and  
143 improved starting points for improved computer simulations [21–23].

144

#### 145 **Acknowledgement**

146 Fundação para a Ciência e Tecnologia (FCT) is acknowledged for financial support  
147 (PTDC/MED-QUI/30591/2017, PTDC/MED-QUI/28800/2017 and SAICTPAC/0019/2015).  
148 Cátia A. Bonito also acknowledges FCT for the Ph.D grant SFRH/BD/130750/2017.

149

#### 150 **References:**

- 151 1 Alam A, Kowal J, Broude E, Roninson I & Locher KP (2019) Structural insight into substrate  
152 and inhibitor discrimination by human P-glycoprotein. *Science* **363**, 753–756.
- 153 2 Kim Y & Chen J (2018) Molecular structure of human P-glycoprotein in the ATP-bound,  
154 outward-facing conformation. *Science* **359**, 915–919.
- 155 3 Li J, Jaimes KF & Aller SG (2014) Refined structures of mouse P-glycoprotein. *Protein Sci* **23**,  
156 34–46.
- 157 4 Ward AB, Szewczyk P, Grimard V, Lee C-W, Martinez L, Doshi R, Caya A, Villaluz M, Pardon  
158 E, Cregger C, Swartz DJ, Falson PG, Urbatsch IL, Govaerts C, Steyaert J & Chang G (2013)  
159 Structures of P-glycoprotein reveal its conformational flexibility and an epitope on the  
160 nucleotide-binding domain. *Proc Natl Acad Sci USA* **110**, 13386–91.
- 161 5 Thongin N, Collins RF, Barbieri A, Shafi T, Siebert A, Ford RC, Thonghin N, Collins RF,  
162 Barbieri A, Shafi T, Siebert A & Ford RC (2018) Novel features in the structure of P-  
163 glycoprotein (ABCB1) in the post-hydrolytic state as determined at 7.9Å resolution. *BMC*  
164 *Struct Biol* **18**, 17.

- 165 6 Nicklisch SCT, Rees SD, McGrath AP, Go kirmak T, Bonito LT, Vermeer LM, Cregger C,  
166 Loewen G, Sandin S, Chang G & Hamdoun A (2016) Global marine pollutants inhibit P-  
167 glycoprotein: Environmental levels, inhibitory effects, and cocrystal structure. *Sci Adv* **2**,  
168 e1600001–e1600001.
- 169 7 Esser L, Zhou F, Pluchino KM, Shiloach J, Ma J, Tang W-K, Gutierrez C, Zhang A, Shukla S,  
170 Madigan JP, Zhou T, Kwong PD, Ambudkar S V., Gottesman MM & Xia D (2017) Structures  
171 of the Multidrug Transporter P-glycoprotein Reveal Asymmetric ATP Binding and the  
172 Mechanism of Polyspecificity. *J Biol Chem* **292**, 446–461.
- 173 8 Szewczyk P, Tao H, McGrath AP, Villaluz M, Rees SD, Lee SC, Doshi R, Urbatsch IL, Zhang  
174 Q & Chang G (2015) Snapshots of ligand entry, malleable binding and induced helical  
175 movement in P-glycoprotein. *Acta Crystallogr D Biol Crystallogr* **71**, 732–741.
- 176 9 Choe S & Sun SX (2005) The elasticity of  $\alpha$ -helices. *J Chem Phys* **122**, 244912.
- 177 10 Aller SG, Yu J, Ward A, Weng Y, Chittaboina S, Zhuo R, Harrell PM, Trinh YT, Zhang Q,  
178 Urbatsch IL & Chang G (2009) Structure of P-glycoprotein reveals a molecular basis for poly-  
179 specific drug binding. *Science* **323**, 1718–1722.
- 180 11 Dantzig AH, Shepard RL, Cao J, Law KL, Ehlhardt WJ, Baughman TM, Bumol TF & Starling  
181 JJ (1996) Reversal of P-glycoprotein-mediated multidrug resistance by a potent  
182 cyclopropyldibenzosuberane modulator, LY335979. *Cancer Res* **56**, 4171–9.
- 183 12 Sato T, Kodan A, Kimura Y, Ueda K, Nakatsu T & Kato H (2009) Functional role of the linker  
184 region in purified human P-glycoprotein. *FEBS J* **276**, 3504–16.
- 185 13 Ferreira RJ, Ferreira M-JU & dos Santos DJVA (2013) Assessing the Stabilization of P-  
186 Glycoprotein's Nucleotide-Binding Domains by the Linker, Using Molecular Dynamics. *Mol*  
187 *Inf* **32**, 529–540.
- 188 14 Kodan A, Yamaguchi T, Nakatsu T, Matsuoka K, Kimura Y, Ueda K & Kato H (2019) Inward-  
189 and outward-facing X-ray crystal structures of homodimeric P-glycoprotein CmABCB1. *Nat*  
190 *Comms* **10**, 88.
- 191 15 Martinez D, Decossas M, Kowal J, Frey L, Stahlberg H, Dufourc EJ, Riek R, Habenstein B,  
192 Bibow S & Loquet A (2017) Lipid Internal Dynamics Probed in Nanodiscs. *ChemPhysChem*  
193 **18**, 2651–2657.
- 194 16 Ferreira RJ, dos Santos DJVA & Ferreira M-JU (2015) P-glycoprotein and membrane roles in  
195 multidrug resistance. *Future Med Chem* **7**, 929–946.
- 196 17 Li MJ, Nath A & Atkins WM (2017) Differential Coupling of Binding, ATP Hydrolysis, and  
197 Transport of Fluorescent Probes with P-Glycoprotein in Lipid Nanodiscs. *Biochemistry* **56**,  
198 2506–2517.
- 199 18 Li MJ, Guttman M & Atkins WM (2018) Conformational dynamics of P-glycoprotein in lipid  
200 nanodiscs and detergent micelles reveal complex motions on a wide time scale. *J Biol Chem*  
201 **293**, 6297–6307.
- 202 19 Ritchie TK, Kwon H & Atkins WM (2011) Conformational Analysis of Human ATP-binding  
203 Cassette Transporter ABCB1 in Lipid Nanodiscs and Inhibition by the Antibodies MRK16

- 204 and UIC2. *J Biol Chem* **286**, 39489–39496.
- 205 20 Dastvan R, Mishra S, Peskova YB, Nakamoto RK & Mchaourab HS (2019) Mechanism of  
206 allosteric modulation of P-glycoprotein by transport substrates and inhibitors. *Science* **364**,  
207 689–692.
- 208 21 Ferreira RJ, Ferreira M-JU & dos Santos DJVA (2012) Insights on P-Glycoprotein's Efflux  
209 Mechanism Obtained by Molecular Dynamics Simulations. *J Chem Theory Comput* **8**, 1853–  
210 1864.
- 211 22 Ferreira RJ, Bonito CA, Ferreira MJU & dos Santos DJVA (2017) About P-glycoprotein: a new  
212 drugable domain is emerging from structural data. *WIREs Comput Mol Sci* **7**, e1316.
- 213 23 Ferreira RJ, Bonito CA, Cordeiro MNDS, Ferreira M-JU & dos Santos DJVA (2017) Structure-  
214 function relationships in ABCG2: insights from molecular dynamics simulations and  
215 molecular docking studies. *Sci Rep* **7**, 15534.
- 216
- 217 **Author contributions:** R. J. F. and D. J. V. A. S. formulated the hypothesis. C.A.B., R. J. F. and  
218 D.J.V.A.S. written the manuscript. R. J. F. performed the MD simulations and rendered the  
219 images. All authors revised the manuscript and agree with its final form.
- 220
- 221 **Competing interests:** All authors declare no competing interests.



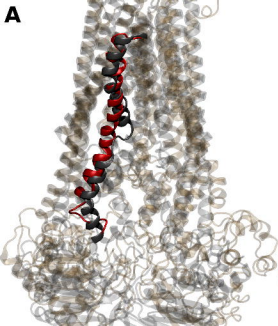

**B**

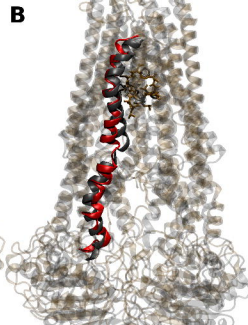

Panel B shows a ribbon diagram of a protein dimer, similar to panel A. The protein structure is rendered in a light gray color. A specific helical region is highlighted in red and black. A brown, branched ligand molecule is bound to the protein, interacting with the highlighted helical region.

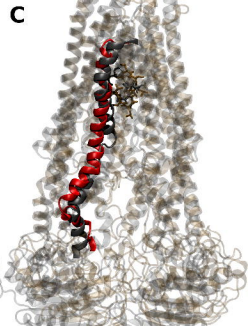

Source: https://www.biorxiv.org/content/10.1101/692988v1.full.pdf
